# Supplementary material for: Anti–MSP-10 IgG indicates recent exposure to Plasmodium vivax infection in the Peruvian Amazon
Source: JCI journal article supplement (doi:10.1172/jci.insight.130769), 2019-11-26

# Supplemental Appendix 1.

## Design, production and characterization of recombinant *Plasmodium falciparum* and *Plasmodium vivax* MSP10 Proteins

### Design

PLASMODB (Plasmodb.org) was the source for the amino sequences for recombinant protein design. The sequence of *P. falciparum* MSP10 was based on strain 3D7; that of *P. vivax* MSP10 was based on strain Sal I.

The post-signal amino acid sequences (**highlighted** in the complete predicted amino acid sequences below) of PfMSP10 (PF3D7\_0620400) and PvMSP10 (PVX\_114145) were synthesized in mammalian cell-optimized codons with predicted O- and N-glycosylation sites converted into alanine residues and cloned into the mammalian cell expression plasmid, pSecTag2. The recombinant protein was engineered to have an IgG Kappa secretory signal sequence, N-terminal hemagglutinin (HA) and C-terminal c-Myc epitope tags, with Tobacco Etch Virus (TEV) protease cleave sites inserted to release the otherwise-unmodified recombinant protein. Underlined amino acids were not included in final recombinant proteins.

## Design of mammalian cell expression of recombinant *Plasmodium* PMS10

### Gene for Synthesis

HA TAG: 9 a/a: Try-Pro-Try-Asp-Val-Pro-Asp-Try-Ala  
TEV site: 6 a/a: Glu-Asn-Leu-Try-Phe-Gln-\*Gly (\*cleavage  
RE sites (5' Bam H1 and 3' Xho I) followed by the following things:

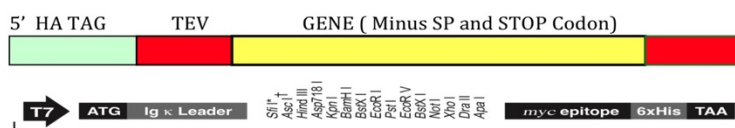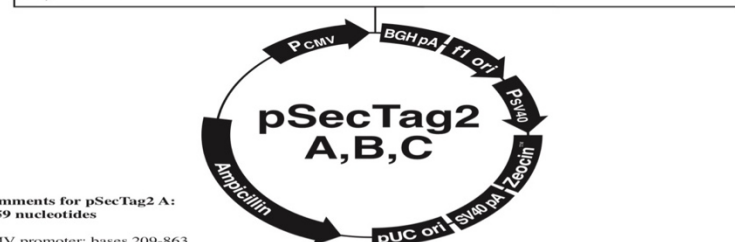

Comments for pSecTag2 A:  
5159 nucleotides

CMV promoter: bases 209-863  
T7 promoter/priming site: bases 863-882  
Murine Ig κ-chain VJ2-C signal peptide: bases 905-967  
Multiple cloning site: bases 970-1081  
c-myc epitope: bases 1082-1114  
Polyhistidine tag: bases 1127-1144  
BGH reverse priming site: bases 1167-1184  
BGH polyadenylation sequence: bases 1166-1380  
f1 origin: bases 1443-1856  
SV40 promoter and origin: bases 1924-2245  
EM-7 promoter: bases 2261-2327  
Zeocin<sup>™</sup> resistance gene: bases 2328-2702  
SV40 polyadenylation sequence: bases 2832-2961  
pUC origin: bases 3345-4018  
Ampicillin resistance gene: bases 4163-5023 (C)

\* The Sfi I site is located before the variable region.

† Frame-dependent variations:  
Asc I is only found in version A.

### PF3D7\_0620400 merozoite surface protein 1 amino acid sequence

MMFFKCNQVFTLVFLLLLYFNNIVYTHVDDIKNTSQKKITYDKYNKNKENMNNNEKNDN  
KDNKDNIYNDNINNDNINNDNINNEDEYKFLSMKHYKDSLNSKLNNDHMNYLIRKR  
KDNTQGSQHFNENIENNENVENNENIENNENNENIENIENNENNENNENIENNENNENN  
ENSSIMNSESYNNIINSNEHNEEQIKKKEEDLIEAFFPFILKKLDNESLSLDNKYDDYYNLP  
NDHNDTHKENSSDHNLLGYKLGNNLKSYLEENDVSQKKTDDINESASSDSENIQEILST  
DSNTSHLKERKNQKAPPGEHKPEVKNALLNSQVASPKGEDEKKSQPQHPLVNSGDQLQ  
HPKEIDENAEKIRRTLLKESRDIKNTTAIIDETVYKFEQLIMKGRYYATAVRNFVIFKVNY  
ICEYSKCGPNSRCYIVEKDKEQCRCRPNYIVDMSVNYFKCIPMKDMNCSKNNGGCDVN  
AECTIVEGAVKQCQSHLYFGDGVFCVKNSQTKQTLYILFIVILLVFQNFFI

### PVX\_114145 merozoite surface protein 10, putative

MKRAKCNKSLTFTIFLLLYVNGAVHVSANELNGTDGGDVPNQKDITKDYSIFERITSEGO  
SASGKDDSPISQSNTQPQEEASDGKQGNTPLDEKNSAKDVEAHFIREGHDKVTHSDVGT  
EEGKATGHVQKNANLRSTSYFSTQGAVSQAYNFVQENHPQLDNNGANVEQVARGQDD  
VGSTENGEGNSGGEGNPLGSDKPGGKPEDASKDTPGNNPEESPNNRQEKGEKEKKEG  
DTDNPNRGKTSEKADQQGGNHPNGLSPDEKNNPKTHNNHSESITNPGDVGALDGEENG  
EGDDQTGISPTTEHPTGDAPPSDHAEKIKNTLLKEGIDLKETTSMDIDNAVYNMEQFILKT  
KFYTTAIRNFVHFVKVNHICEYSKCGANARCYIVEKDKEECRCRANYMPDDSDYFKCIP  
MVEKDCKSKENGNCVNAECSIDKNKDIKCQCKFNYIGDGIFCVMGSQAKQSLCLLLLLL  
ICLLHKFLF

### Production and characterization

Plasmid constructs were expressed in HEK-293 cells using transient transfection. Recombinant protein was affinity-purified from culture supernatants with nickel affinity chromatography. SDS-PAGE (Coomassie Blue staining) and Western blot (using anti-His<sub>6</sub> monoclonal antibody) analysis demonstrated proteins of the expected size. The identity of the recombinant proteins was further confirmed by anti-MSP10 monoclonal antibodies and mass spectrometry.

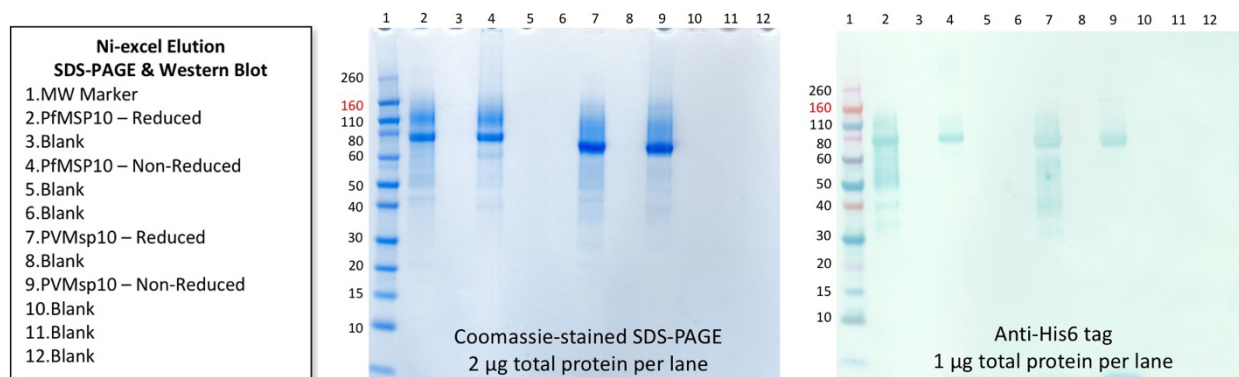

## Supplemental Figure 1.

Relationship between corrected OD values and the time since last infection assessed through a LOESS smoothed fit curve with confidence region, A: serum samples, B: DBS samples.

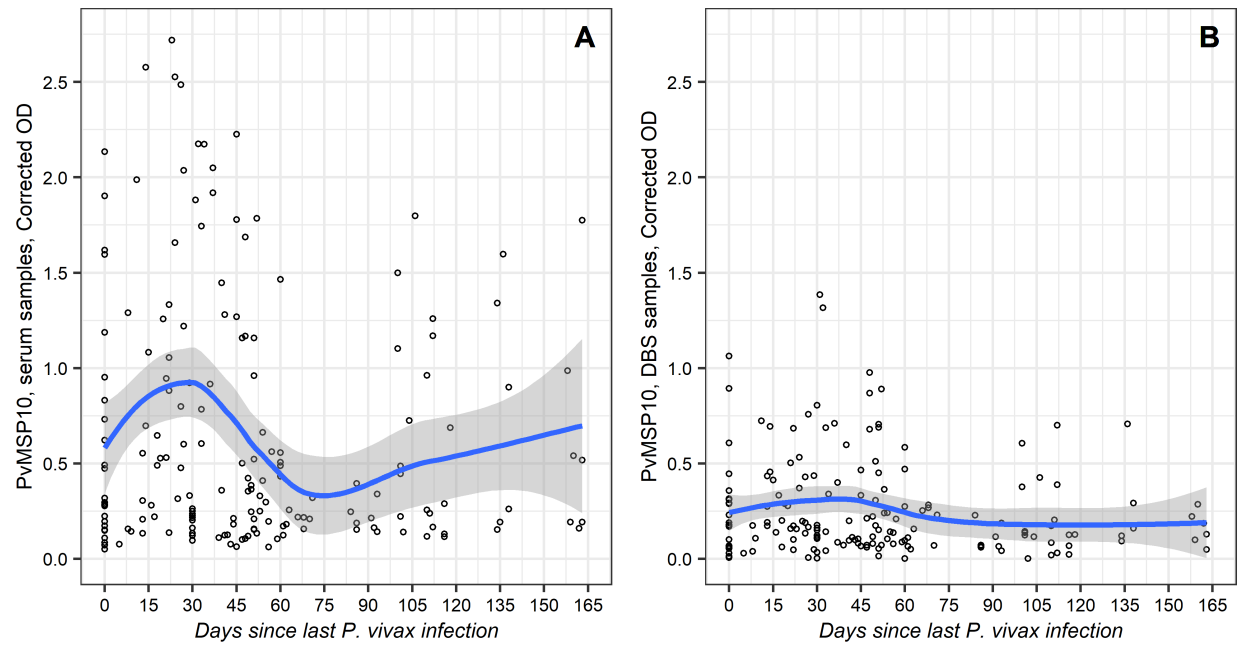

FULL UNEDITED SDS-PAGE GEL and Western Blot

**Ni-excel Elution**  
**SDS-PAGE & Western Blot**

1.MW Marker  
2.PfMSP10 – Reduced  
3.Blank  
4.PfMSP10 – Non-Reduced  
5.Blank  
6.Blank  
7.PVMsp10 – Reduced  
8.Blank  
9.PVMsp10 – Non-Reduced  
10.Blank  
11.Blank  
12.Blank

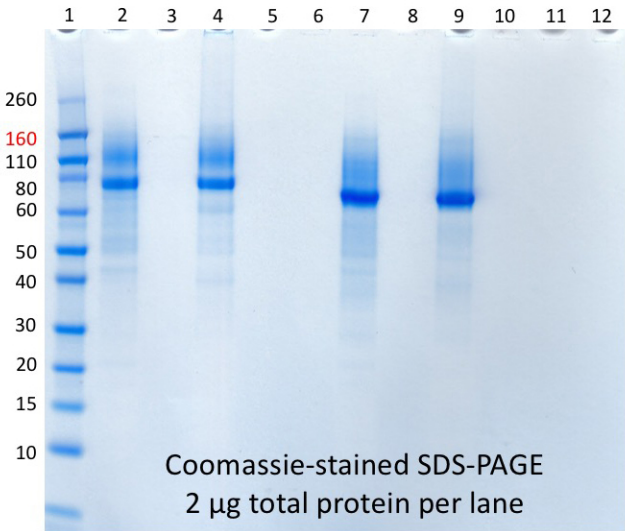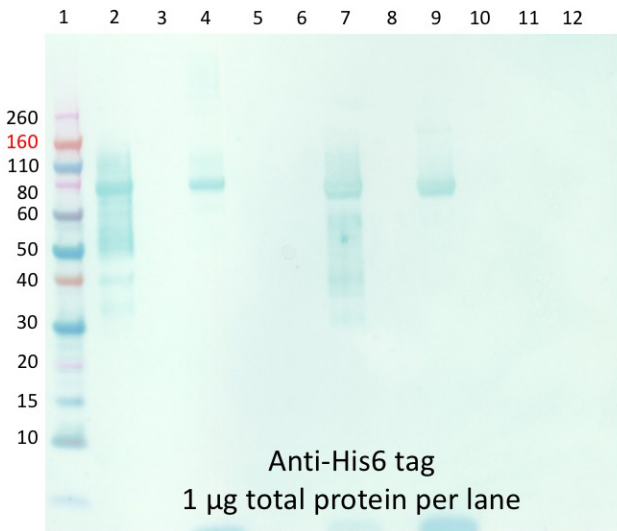

Supplement: sd1 [file 1]
